# Supplementary material
Source: PubMed Central journal article supplement (PMC8202970)
Supplement: NIHMS1706447-supplement-Supple_figs_tables.pdf [file NIHMS1706447-supplement-Supple_figs_tables.pdf]

**SUPPLEMENTARY FIGURES AND TABLES**

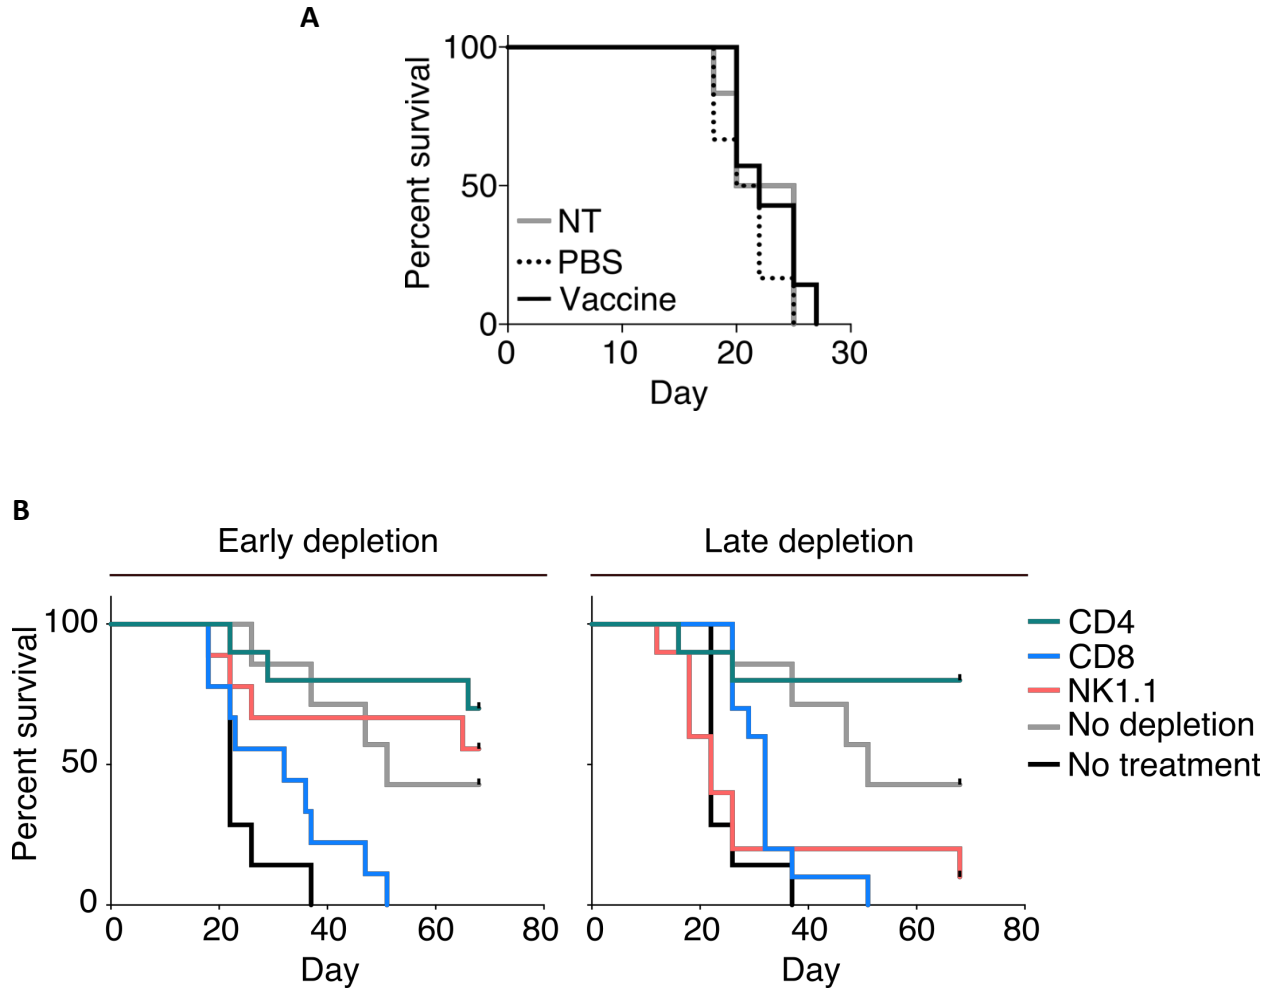

|              | CD4 early | CD8 early | NK early | CD4 late | CD8 late | NK late |
|--------------|-----------|-----------|----------|----------|----------|---------|
| CD8 early    | ***       |           |          |          |          |         |
| NK early     | **        | **        |          |          |          |         |
| CD4 late     | NS        | **        | NS       |          |          |         |
| CD8 late     | **        | NS        | *        | **       |          |         |
| NK late      | **        | NS        | *        | **       | NS       |         |
| No depletion | NS        | *         | NS       | NS       | *        | *       |
| No treatment | ***       | NS        | *        | **       | *        | NS      |

\* < 0.05, \*\* < 0.01, \*\*\* < 0.001, NS = not significant

**Supplementary Figure S1:** A) Survival curves of animals treated with single agent neoepitope vaccine or indicated controls. B) Survival curves of animals depleted of indicated cell populations either early (day 1) or late (day 15) of tumor growth. Statistical analysis of tumor survival curves is presented within the lower table.

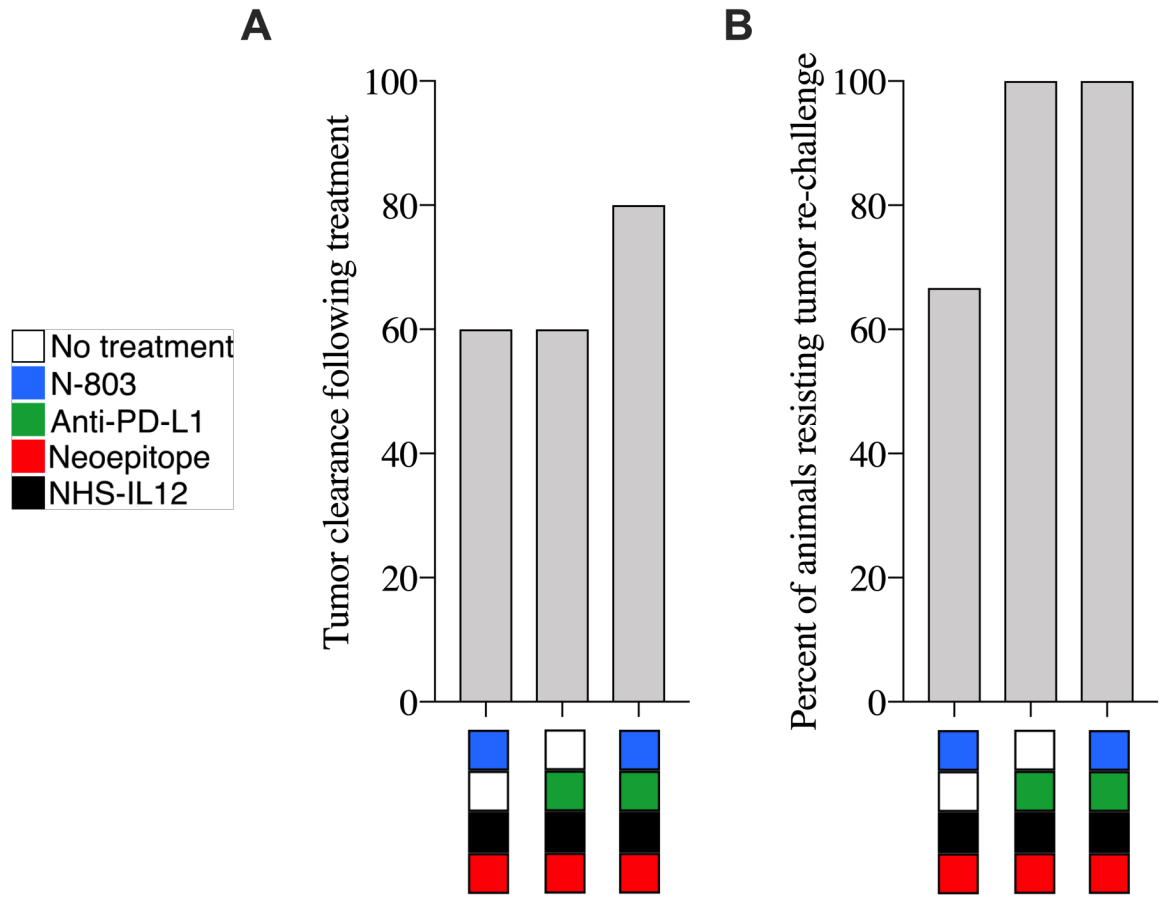

**Supplementary Figure S2:** A) Utilizing the treatment schedule presented in Figure 2A, the percentage of animals treated as indicated that were able to induce tumor regression. B) Percentage of animals that resolved their primary tumor following the indicated treatment and resisted a subsequent normally lethal challenge with the MC38 tumor.

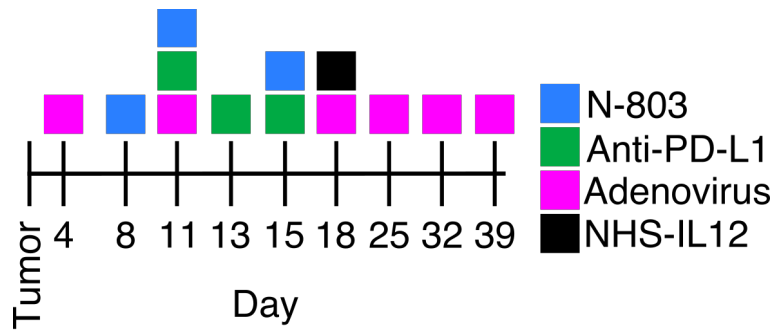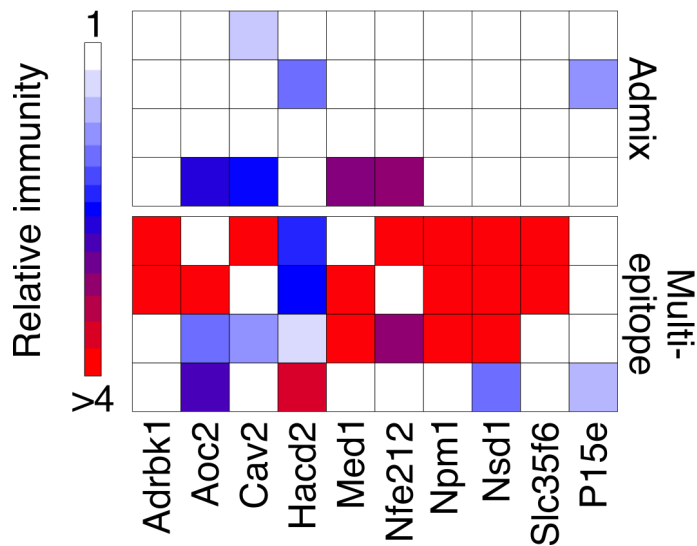

**Supplementary Figure S3:** Top panel, treatment schedule. Bottom panel, relative immunity to neoepitopes expressed by MC38 tumors, but not present within the vaccine following administration of either a multi-epitope adenoviral vaccine or admixed neoepitope vaccine in which each of the four individual vaccines are mixed together prior to injection.

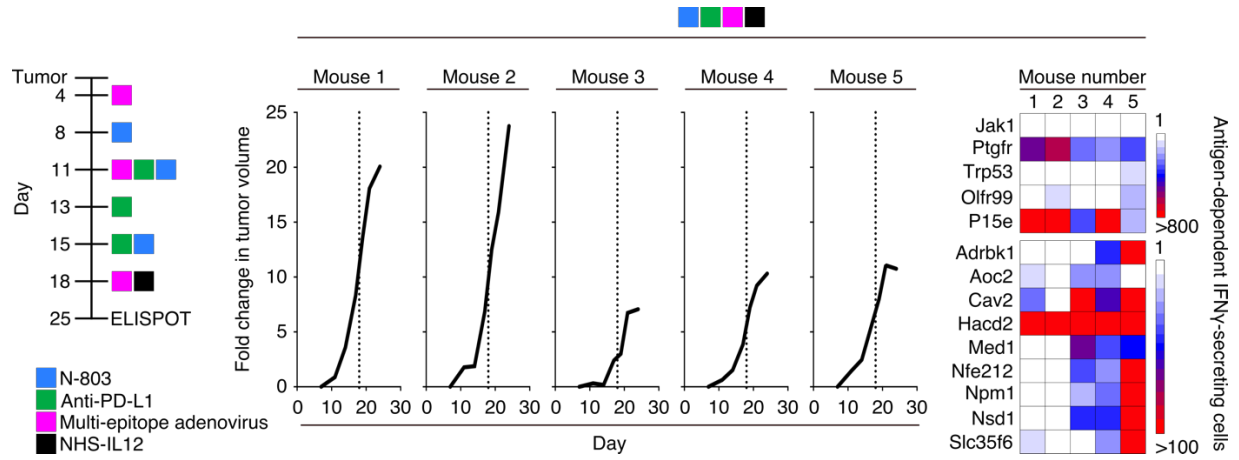

**Supplementary Figure S4:** Left panel, treatment schedule. Middle panel, fold change in tumor growth, based upon day 7 tumor measurements. Dotted line indicates the administration of NHS-IL12 on day 18 of tumor growth. Right panel, quantification of the immunity generated by animals against MC38 tumor antigens.

| Target           | Application          | Clone        | Vendor                                      |
|------------------|----------------------|--------------|---------------------------------------------|
| H2K <sup>b</sup> | Flow Analysis        | AF6-88.5     | BD Biosciences                              |
| H2D <sup>b</sup> | Flow Analysis        | KH95         | BD Biosciences                              |
| CD44             | Flow Analysis        | IM7          | BD Biosciences                              |
| CD62L            | Flow Analysis        | MEL-14       | BD Biosciences                              |
| CD11b            | Flow Analysis        | M1/70        | BD Biosciences                              |
| CD3 $\epsilon$   | Flow Analysis        | 145-2C11     | BD Pharmingen                               |
| CD4              | Flow Analysis        | RM4-5        | BD Pharmingen                               |
| CD8a             | Flow Analysis        | 53-6.7       | BD Pharmingen                               |
| CD45             | Flow Analysis        | 30-F11       | BD Pharmingen<br>ThermoFisher<br>Scientific |
| CD45.2           | Flow Analysis        | 104          | Biolegend                                   |
| TCR $\beta$      | Flow Analysis        | H57-597      | Biolegend                                   |
| CD38             | Flow Analysis        | 90           | Biolegend                                   |
| F4/80            | Flow Analysis        | BM8          | Biolegend                                   |
| TNF              | Flow Analysis        | MP6-<br>XT22 | ThermoFisher<br>Scientific                  |
| IFN $\gamma$     | Flow Analysis        | XMG1.2       | ThermoFisher<br>Scientific                  |
| CD127            | Flow Analysis        | A7R34        | ThermoFisher<br>Scientific                  |
| CD206            | Flow Analysis        | MR6F3        | ThermoFisher<br>Scientific                  |
| CD4              | In-vivo<br>Depletion | GK1.5        | BioXcell                                    |
| CD8              | In-vivo<br>Depletion | 2.43         | BioXcell                                    |
| NK1.1            | In-vivo<br>Depletion | PK136        | BioXcell                                    |
| PD-L1            | In-vivo<br>Blockade  | 10F.9G2      | BioXcell                                    |

**Supplementary Table S1: list of antibodies used in this study.**

| RefSeq Gene ID | Gene ID  | Protein Change | Genomic Change | Normal Protein Sequence | Allele Frequency | TPM     | Median TPM | Affinity (nM) | Allele | Neoepitope |
|----------------|----------|----------------|----------------|-------------------------|------------------|---------|------------|---------------|--------|------------|
| NM_130863.2    | Adrbk1   | p.M526I        | C->G           | IVHGYMSKM,              | 0.52             | 53.37   | 3.49       | 107           | H-2-Kb | IVHGYMSKI  |
| NM_027406.1    | Aldh1l1  | p.V601L        | G->T           | TVVIKPAQV,              | 0.48             | 13.16   | 3.49       | 347           | H-2-Kb | TVVIKPAQL  |
| NM_178932.1    | Aoc2     | p.G443V        | G->T           | IGGHFYGGGL,             | 0.60             | 4.18    | 3.49       | 9             | H-2-Kb | IVGHFYGGGL |
| NM_026120.4    | Carnmt1  | p.C391S        | G->C           | MMKYYYECV,              | 0.60             | 42.86   | 3.49       | 151           | H-2-Kb | MMKYYYESV  |
| NM_026120.4    | Carnmt1  | p.C391S        | G->C           | MKYYYECVL,              | 0.60             | 42.86   | 3.49       | 156           | H-2-Kb | MKYYYESVL  |
| NM_016900.4    | Cav2     | p.V25F         | G->T           | DAYSHHSGV,              | 0.45             | 66.30   | 3.49       | 70            | H-2-Kb | DAYSHHSGF  |
| NM_001081012.1 | Ccdc171  | p.A1169T       | G->A           | AATRNDFTL,              | 0.44             | 7.67    | 3.49       | 238           | H-2-Db | TATRNDFTL  |
| NM_025689.4    | Ccdc51   | p.A394P        | G->C           | VTFLATLPL,              | 0.39             | 5.45    | 3.49       | 97            | H-2-Kb | VTFLPTLPL  |
| NM_025689.4    | Ccdc51   | p.A394P        | G->C           | TCVTFLATL,              | 0.39             | 5.45    | 3.49       | 279           | H-2-Kb | TCVTFLPTL  |
| NM_008533.2    | Cd180    | p.P440L        | C->T           | SPFQNLHLL,              | 0.23             | 6.17    | 3.49       | 247           | H-2-Db | SLFQNLHLL  |
| NM_138647.3    | Cers1    | p.P126R        | C->G           | TSYPFFHDP,              | 0.53             | 5.23    | 3.49       | 284           | H-2-Kb | TSYRFFHDP  |
| NM_013581.3    | Cog1     | p.H151Q        | C->A           | QLYLCCCHL,              | 0.61             | 31.13   | 3.49       | 492           | H-2-Kb | QLYLCCQQL  |
| NM_170588.3    | Cpne1    | p.D302Y        | C->A           | SSPDSLHYL,              | 0.16             | 86.34   | 3.49       | 211           | H-2-Db | SSPSLHYL   |
| NM_170588.3    | Cpne1    | p.D302Y        | C->A           | DSLHYLSPT,              | 0.16             | 86.34   | 3.49       | 212           | H-2-Kb | YSLHYLSPT  |
| NM_172704.3    | Dnajc11  | p.D11N         | G->A           | DNEDYYSLL,              | 0.50             | 32.24   | 3.49       | 478           | H-2-Kb | NNEDYYSLL  |
| NM_007875.2    | Dpagt1   | p.V213L        | G->T           | ASIIVFNLV,              | 0.22             | 38.36   | 3.49       | 102           | H-2-Kb | ASIIVFNLL  |
| NM_010091.4    | Dvl1     | p.G400V        | G->T           | SSLTSSVPG,              | 0.36             | 27.77   | 3.49       | 136           | H-2-Db | SSLTSSVPV  |
| NM_053103.5    | Entpd7   | p.L385F        | G->C           | SCRTLLSPL,              | 0.73             | 11.61   | 3.49       | 193           | H-2-Kb | SCRTEFLSPL |
| NM_022009.2    | Flii     | p.G221C        | C->A           | TSLEGLSNL,              | 0.50             | 99.85   | 3.49       | 259           | H-2-Kb | TSLECLSNL  |
| NM_001080746.2 | Gtf2i    | p.G415V        | C->A           | YGIPRLERI,              | 0.32             | 86.31   | 3.49       | 407           | H-2-Kb | VVIPRLERI  |
| NM_023587.2    | Hacd2    | p.Q231H        | G->T           | SYIPLFPQL,              | 0.51             | 30.08   | 3.49       | 54            | H-2-Kb | SYIPLPHL   |
| NM_023587.2    | Hacd2    | p.Q231H        | G->T           | LFPQLYFHM,              | 0.51             | 30.08   | 3.49       | 425           | H-2-Kb | LFPPLYFHM  |
| NM_146145.2    | Jak1     | p.G654V        | C->A           | IVYLYGVCV,              | 0.41             | 134.68  | 3.49       | 73            | H-2-Kb | IVYLYVVCV  |
| NM_178633.3    | Klh12    | p.R296L        | C->A           | VRTRLRTPM,              | 0.60             | 22.14   | 3.49       | 101           | H-2-Db | VLTRLRTPM  |
| NM_028233.2    | Lrpprc   | p.A359P        | C->G           | TAFQVLLAL,              | 0.32             | 69.11   | 3.49       | 258           | H-2-Kb | TAFQVLLPL  |
| NM_001081392.1 | Mdn1     | p.N1209T       | A->C           | LSRAFRRNF,              | 0.38             | 25.16   | 3.49       | 164           | H-2-Kb | LSRAFRRNF  |
| NM_001081392.1 | Mdn1     | p.N1209T       | A->C           | AFRRNFVEL,              | 0.38             | 25.16   | 3.49       | 280           | H-2-Kb | AFRRNFVEL  |
| NM_001080118.1 | Med1     | p.V452L        | C->A           | FVSFQHPV,               | 0.52             | 57.38   | 3.49       | 78            | H-2-Kb | FSLSFQHPV  |
| NM_010902.4    | Nfe2l2   | p.Q104L        | T->A           | ASYSQVAHI,              | 0.40             | 57.04   | 3.49       | 29            | H-2-Kb | ASYSLVAHI  |
| NM_008722.3    | Npm1     | p.V117L        | C->A           | ISGQHLVAV,              | 0.12             | 2280.32 | 3.49       | 260           | H-2-Kb | ISGQHLAV   |
| NM_008739.3    | Nsd1     | p.Q416L        | A->T           | KGYRHKVPQ,              | 0.21             | 9.92    | 3.49       | 39            | H-2-Kb | KGYRHKVPL  |
| NM_146515.2    | Olfr99   | p.Y249N        | A->T           | VVLLFYSTV,              | 0.27             | 7.59    | 3.49       | 37            | H-2-Kb | VVLLFNSTV  |
| NM_011151.2    | Ppm1b    | p.R191L        | G->T           | IQRVNGSLA,              | 0.32             | 58.87   | 3.49       | 142           | H-2-Db | IQLVNGSLA  |
| NM_008966.3    | Ptgfr    | p.D77Y         | C->A           | VITDFFGHL,              | 0.38             | 7.33    | 3.49       | 13            | H-2-Kb | VITYFFGHL  |
| NM_008966.3    | Ptgfr    | p.D77Y         | C->A           | ITDFFGHLI,              | 0.38             | 7.33    | 3.49       | 56            | H-2-Kb | ITYFFGHLI  |
| NM_152824.1    | Rbm17    | p.G90W         | C->A           | SAGEVLIPL,              | 0.36             | 110.07  | 3.49       | 490           | H-2-Kb | SAWEVLIPL  |
| NM_016926.1    | Sart3    | p.S709N        | C->T           | SVTVFVSNL,              | 0.32             | 47.37   | 3.49       | 107           | H-2-Kb | SVTVFVNLL  |
| NM_001081341.1 | Scaper   | p.T1293K       | G->T           | TVLQKLCQL,              | 0.35             | 13.95   | 3.49       | 330           | H-2-Kb | KVLQKLCQL  |
| NM_175675.3    | Slc35f6  | p.G322V        | G->T           | QILVFLILL,              | 0.40             | 15.14   | 3.49       | 65            | H-2-Kb | QILVFLILL  |
| NM_017407.2    | Spag5    | p.I699N        | T->A           | AQLQLTST,               | 0.40             | 60.84   | 3.49       | 443           | H-2-Db | AQLQNLST   |
| NM_011491.3    | Stc2     | p.I207N        | A->T           | SWGGLCSIL,              | 0.52             | 6.81    | 3.49       | 472           | H-2-Kb | SWGGLCSNL  |
| NM_133932.2    | Tada3    | p.R62L         | C->A           | SSASRRLRV,              | 0.36             | 33.90   | 3.49       | 206           | H-2-Kb | SSASRLLV   |
| NM_133966.2    | Taf5l    | p.A573S        | C->A           | FMACNLLLV,              | 0.69             | 29.82   | 3.49       | 79            | H-2-Db | FMSCNLLLV  |
| NM_133966.2    | Taf5l    | p.A573S        | C->A           | VQFMACNLL,              | 0.69             | 29.82   | 3.49       | 95            | H-2-Kb | VQFMSCNLL  |
| NM_201359.2    | Tmem106c | p.T137S        | C->G           | VVLDVTATL,              | 0.71             | 7.69    | 3.49       | 348           | H-2-Kb | VVLDVTASL  |
| NM_001127233.1 | Trp53    | p.G242V        | G->T           | MGGMNRRI,               | 0.64             | 115.64  | 3.49       | 77            | H-2-Db | MGVMNRRI   |
| NM_001276465.1 | Vps13d   | p.W2765L       | C->A           | RALSGWEPF,              | 0.54             | 15.09   | 3.49       | 413           | H-2-Db | RALSGLEPF  |
| NM_026417.4    | Yipf4    | p.G171A        | G->C           | VAYGQVLGV,              | 0.51             | 38.03   | 3.49       | 106           | H-2-Kb | VAYGQVLAV  |
| NM_026417.4    | Yipf4    | p.G171A        | G->C           | LGVIIGYSLL,             | 0.51             | 38.03   | 3.49       | 241           | H-2-Kb | LAVIGYSLL  |
| NM_001309446.1 | Zfand4   | p.R272L        | G->T           | AARHRLLRV,              | 0.54             | 15.46   | 3.49       | 270           | H-2-Kb | AALHRLLRV  |
| NM_026856.2    | Zfp644   | p.R948L        | C->A           | RGHLHRAGL,              | 0.49             | 30.13   | 3.49       | 293           | H-2-Kb | LGHLHRAGL  |

**Supplementary Table S2: List of neoepitopes shared amongst both MC38 tumors analyzed.**

| Animal Chemistry Panels Day 33  |         |                     |
|---------------------------------|---------|---------------------|
|                                 | ALT-803 | Age-matched control |
| Sodium (mmol/L)                 | 153     | 157                 |
| Potassium (mmol/L)              | 6.1     | 5.2                 |
| Chloride (mmol/L)               | 110     | 115                 |
| Calcium (mmol/L)                | 2.34    | 2.39                |
| Magnesium (mmol/L)              | 1.22    | 1.18                |
| Phosphorous, inorganic (mg/dL)  | 7.2     | 8.2                 |
| Glucose (mg/dL)                 | 158     | 123                 |
| BUN (mg/dL)                     | 18      | 23                  |
| Creatinine (mg/dL)              | 0.1     | 0.1                 |
| Uric Acid (mg/dL)               | 4       | 2.2                 |
| Albumin (g/dL)                  | 3.4     | 3                   |
| Protein, Total (g/dL)           | 5.2     | 4.9                 |
| Cholesterol (mg/dL)             | 86      | 88                  |
| Triglycerides (mg/dL)           | 155     | 160                 |
| Alkaline Phosphatase (U/L)      | 98      | 78                  |
| ALT/GPT (Alanine Trans) (U/L)   | 207     | 28                  |
| AST/GOT (Aspartate Trans) (U/L) | 291     | 65                  |
| Amylase (U/L)                   | 2178    | 2568                |
| Ck, Total (U/L)                 | 318     | 298                 |
| LD (Lacate Dehydrogen) (U/L)    | 691     | 322                 |

| Animal Chemistry Panels Day 55  |         |                     |
|---------------------------------|---------|---------------------|
|                                 | ALT-803 | Age-matched control |
| Alkaline Phosphatase (U/L)      | 150     | 133                 |
| ALT/GPT (Alanine Trans) (U/L)   | 21      | 40                  |
| AST/GOT (Aspartate Trans) (U/L) | 66      | 66                  |
| Amylase (U/L)                   | 2962    | 2971                |
| Ck, Total (U/L)                 | 716     | 466                 |
| LD (Lacate Dehydrogen) (U/L)    | 426     | 289                 |

| CBC Day 33                              |         |                     |
|-----------------------------------------|---------|---------------------|
|                                         | ALT-803 | Age-matched control |
| WBC Count (K/uL)                        | 4.62    | 6.6                 |
| RBC Count (M/uL)                        | 8.57    | 10.4                |
| Hemoglobin (g/dL)                       | 11.7    | 14.8                |
| Hematocrit (%)                          | 39.6    | 48.7                |
| Mean corpuscular volume (fL)            | 46.2    | 46.8                |
| Platelets (K/uL)                        | 486     | 214                 |
| Polymorphonuclear leukocyte (Polys) (%) | 35.8    | 46.5                |
| Lymphocytes (%)                         | 56.6    | 40                  |
| Monocytes (%)                           | 4.4     | 7.7                 |
| Eosinophils (%)                         | 0.4     | 2.4                 |
| Basophils (%)                           | 0.2     | 0.2                 |
| Polys Absolute (K/uL)                   | 1.654   | 3.069               |
| Lymphocytes Absolute (K/uL)             | 2.615   | 2.64                |
| Monocytes Absolute (K/uL)               | 0.203   | 0.508               |
| Eosinophils Absolute (K/uL)             | 0.018   | 0.158               |
| Basophils Absolute (K/uL)               | 0.009   | 0.013               |

| CBC Day 55                              |         |                     |
|-----------------------------------------|---------|---------------------|
|                                         | ALT-803 | Age-matched control |
| WBC Count (K/uL)                        | 11.31   | 6.86                |
| RBC Count (M/uL)                        | 9.53    | 8.73                |
| Hemoglobin (g/dL)                       | 12.9    | 12.4                |
| Hematocrit (%)                          | 42      | 40.1                |
| Mean corpuscular volume (fL)            | 43.9    | 45.9                |
| Platelets (K/uL)                        | 925     | 838                 |
| Polymorphonuclear leukocyte (Polys) (%) | 7.1     | 9.4                 |
| Lymphocytes (%)                         | 88.5    | 85.2                |
| Monocytes (%)                           | 0.7     | 1.5                 |
| Eosinophils (%)                         | 2.2     | 2.3                 |
| Basophils (%)                           | 0.4     | 0.2                 |
| Polys Absolute (K/uL)                   | 0.803   | 0.645               |
| Lymphocytes Absolute (K/uL)             | 10.009  | 5.845               |
| Monocytes Absolute (K/uL)               | 0.079   | 0.103               |
| Eosinophils Absolute (K/uL)             | 0.249   | 0.158               |
| Basophils Absolute (K/uL)               | 0.045   | 0.014               |

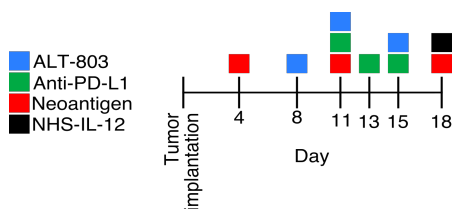

**Supplementary Table S3:** Blood chemistries on days 33 and 55, and histopathological examination of tissues harvested from animals on day 33 of tumor growth. Tissues were examined by a board-certified pathologist (VitroVivo Biotech) of tumor growth. Blood and serum were analyzed by the Department of Laboratory Medicine, NIH Clinical Center.
